# Supplementary material
Source: PubMed Central journal article supplement (PMC2034213)

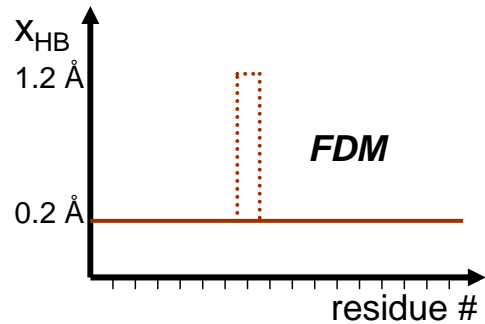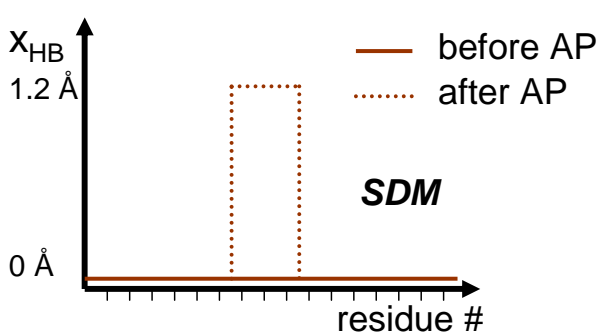

Supplement: pnas_0705759104_1.pdf [file pnas_0705759104_1.pdf]
